# Supplementary material for: Food inflation and child undernutrition in low and middle income countries
Source: Springer Nature journal article supplement (doi:10.1038/s41467-023-41543-9), 2023-09-16
Supplement: MOESM1 [file 41467_2023_41543_MOESM1_ESM.pdf]

## Supplementary Information

# Food inflation and child undernutrition in low and middle income countries

Derek Headey<sup>1\*</sup>, Marie Ruel<sup>2</sup>

1. Senior Research Fellow, The International Food Policy Research Institute (IFPRI), Colombo Sri Lanka

2. Senior Research Fellow, The International Food Policy Research Institute (IFPRI), Washington DC USA

\*Correspondence: d.headey@cgiar.org

## Contents

|                                                                                                                                                                                                                                                                              |           |
|------------------------------------------------------------------------------------------------------------------------------------------------------------------------------------------------------------------------------------------------------------------------------|-----------|
| Supplementary Tables .....                                                                                                                                                                                                                                                   | 3         |
| <b>Supplementary Table 1. Descriptive statistics for key variables .....</b>                                                                                                                                                                                                 | <b>3</b>  |
| <b>Supplementary Table 2. Summary statistics for additional country level control variables used in robustness tests.....</b>                                                                                                                                                | <b>4</b>  |
| <b>Supplementary Table 3. Mean prevalence of wasting and stunting prevalence by DHS round.....</b>                                                                                                                                                                           | <b>5</b>  |
| <b>Supplementary Table 4. Sample sizes and population shares pooled by country .....</b>                                                                                                                                                                                     | <b>8</b>  |
| <b>Supplementary Table 5. Weighted multivariate linear probability models of severe wasting risks as a function of 5% increases in the real food price index over the past 3 months interacted with urban locality, gender, asset poverty and farmland ownership.....</b>    | <b>9</b>  |
| <b>Supplementary Table 6. Weighted multivariate linear probability models of wasting risks as a function of 5% increases in the real food price index over the past 3 months, controlling for other national level indicators.....</b>                                       | <b>10</b> |
| <b>Supplementary Table 7. Weighted multivariate linear probability models of stunting risks as a function of 5% increases in the real food price index in the first 1000 days of life, interacted with urban locality, gender, asset poverty and farmland ownership.....</b> | <b>11</b> |
| Supplementary Figures .....                                                                                                                                                                                                                                                  | 13        |
| <b>Supplementary Figure 1. Local polynomial estimates of wasting (WHZ&lt; -2) prevalence against child age in months for various DHS strata .....</b>                                                                                                                        | <b>13</b> |
| <b>Supplementary Figure 2. Local polynomial estimates of wasting (WHZ&lt; -2) prevalence against child age in months for children from asset-poor and non-poor households in India.....</b>                                                                                  | <b>15</b> |
| <b>Supplementary Figure 3. A histogram of real food price changes in the 3 months prior to wasting measurement .....</b>                                                                                                                                                     | <b>16</b> |

**Supplementary Figure 4. Weighted multivariate linear probability models of wasting and stunting risks as a function of poor diet diversity in the past 24 hours and diarrhea or fever in the past two weeks ..... 17**

**Supplementary Figure 5. Weighted multivariate linear probability coefficients of wasting and severe wasting as a function of both food inflation and total inflation over the past 3 months ..... 18**

**Supplementary Figure 6. Weighted multivariate linear probability coefficients of stunting and severe stunting for children 24-59 months as a function of food inflation and total inflation at various stages of the first 1000 days of life..... 19**

# Supplementary Tables

**Supplementary Table 1. Descriptive statistics for key variables**

| Variable                                        | N         | Mean  | Std. Dev. | Min    | Max   |
|-------------------------------------------------|-----------|-------|-----------|--------|-------|
| <u>Nutrition outcomes</u>                       |           |       |           |        |       |
| Wasting (WHZ<-2)                                | 1,271,886 | 0.13  | 0.33      | 0      | 1     |
| Severe Wasting (WHZ<-3)                         | 1,271,886 | 0.05  | 0.22      | 0      | 1     |
| Stunting (HAZ <-2)                              | 1,254,633 | 0.35  | 0.48      | 0      | 1     |
| Severe Stunting (HAZ <-3)                       | 1,254,633 | 0.15  | 0.35      | 0      | 1     |
| <u>National-level indicators</u>                |           |       |           |        |       |
| Real food inflation, last 3 months              | 1,271,886 | -0.10 | 2.24      | -10.67 | 13.71 |
| Real food inflation, last 12 months             | 1,271,886 | 0.25  | 3.10      | -10.32 | 19.96 |
| <u>Individual, mother, household indicators</u> |           |       |           |        |       |
| Household owns no DHS assets (asset-poor)       | 1,271,886 | 0.26  | 0.44      | 0      | 1     |
| Household owns some (< 5 y) assets              | 1,271,886 | 0.63  | 0.48      | 0      | 1     |
| Household owns all 5 assets                     | 1,271,886 | 0.11  | 0.31      | 0      | 1     |
| Mother has 9 or more years of schooling         | 1,271,886 | 0.32  | 0.47      | 0      | 1     |
| Household has piped water                       | 1,271,886 | 0.39  | 0.49      | 0      | 1     |
| Household has flush toilet                      | 1,271,886 | 0.35  | 0.48      | 0      | 1     |
| Child born in medical facility                  | 1,271,886 | 0.66  | 0.47      | 0      | 1     |
| Mother received 4 or more ANC visits            | 1,271,886 | 0.70  | 0.46      | 0      | 1     |
| Child received all vaccinations                 | 1,271,886 | 0.42  | 0.49      | 0      | 1     |
| Teenage mother (at birth)                       | 1,271,886 | 0.17  | 0.38      | 0      | 1     |
| Mother has 4 or more children                   | 1,271,886 | 0.34  | 0.47      | 0      | 1     |
| Household is rural                              | 1,271,886 | 0.70  | 0.46      | 0      | 1     |
| Child is girl                                   | 1,271,886 | 0.49  | 0.50      | 0      | 1     |
| Household owns farmland                         | 1,049,200 | 0.54  | 0.50      | 0      | 1     |
| Poor diet in past 24 hours (<4 of 7 foods)      | 327,522   | 0.71  | 0.55      | 0      | 1     |
| Diarrhea in past 2 weeks                        | 1,265,488 | 0.13  | 0.33      | 0      | 1     |
| Fever in past 2 weeks                           | 1,257,720 | 0.20  | 0.40      | 0      | 1     |

Source: Authors' estimates. See text for details on sources.

**Supplementary Table 2. Summary statistics for additional country level control variables used in robustness tests**

| Variable                         | N   | Mean   | Std. dev. | Min   | Max     |
|----------------------------------|-----|--------|-----------|-------|---------|
| Growth in broad money (%)        | 125 | 15.95  | 10.70     | -9.30 | 69.08   |
| Battle deaths per 100,000 people | 129 | 107.55 | 324.23    | 0.00  | 1817.00 |
| Growth in GDP per capita (%)     | 130 | 0.00   | 0.00      | -0.01 | 0.02    |
| Growth in food production (%)    | 130 | 0.04   | 0.07      | -0.23 | 0.31    |
| Growth in terms of trade (%)     | 130 | 0.03   | 0.09      | -0.39 | 0.32    |

Source: Authors' estimates. See text for details on sources.

**Supplementary Table 3. Mean prevalence of wasting and stunting prevalence by DHS round**

| Country        | Survey start | Survey end | Mod/severe wasting | Mod/severe stunting |
|----------------|--------------|------------|--------------------|---------------------|
| Albania        | 2008         | 2009       | 10.0%              | 23.9%               |
| Albania        | 2017         | 2018       | 2.2%               | 12.6%               |
| Armenia        | 2005         | 2005       | 5.3%               | 15.5%               |
| Armenia        | 2010         | 2010       | 4.2%               | 22.2%               |
| Armenia        | 2015         | 2016       | 5.3%               | 10.4%               |
| Bangladesh     | 2004         | 2004       | 14.6%              | 49.6%               |
| Bangladesh     | 2007         | 2007       | 17.2%              | 41.6%               |
| Bangladesh     | 2011         | 2011       | 15.9%              | 40.6%               |
| Bangladesh     | 2014         | 2014       | 14.7%              | 36.6%               |
| Bangladesh     | 2017         | 2018       | 8.8%               | 31.3%               |
| Benin          | 2001         | 2001       | 9.9%               | 38.6%               |
| Benin          | 2006         | 2006       | 9.0%               | 43.4%               |
| Benin          | 2011         | 2012       | 17.5%              | 47.0%               |
| Benin          | 2017         | 2018       | 5.3%               | 32.9%               |
| Bolivia        | 2003         | 2003       | 2.2%               | 33.5%               |
| Bolivia        | 2008         | 2008       | 1.7%               | 26.4%               |
| Burkina Faso   | 2003         | 2003       | 24.1%              | 42.9%               |
| Burkina Faso   | 2010         | 2010       | 16.0%              | 34.2%               |
| Burundi        | 2010         | 2010       | 6.2%               | 55.2%               |
| Burundi        | 2016         | 2017       | 5.1%               | 54.5%               |
| Cambodia       | 2005         | 2005       | 8.6%               | 44.8%               |
| Cambodia       | 2010         | 2010       | 12.0%              | 40.1%               |
| Cambodia       | 2014         | 2014       | 10.3%              | 32.6%               |
| Cameroon       | 2004         | 2004       | 6.2%               | 35.2%               |
| Cameroon       | 2011         | 2011       | 5.9%               | 31.7%               |
| Cameroon       | 2018         | 2019       | 4.1%               | 28.3%               |
| Chad           | 2004         | 2004       | 18.4%              | 42.7%               |
| Chad           | 2014         | 2015       | 15.1%              | 42.9%               |
| Colombia       | 2005         | 2005       | 2.1%               | 15.7%               |
| Colombia       | 2010         | 2010       | 1.1%               | 14.5%               |
| Congo, Rep.    | 2005         | 2005       | 8.4%               | 28.8%               |
| Congo, Rep.    | 2011         | 2012       | 5.7%               | 26.8%               |
| Congo (DRC)    | 2007         | 2007       | 11.0%              | 45.0%               |
| Congo (DRC)    | 2013         | 2014       | 8.7%               | 44.0%               |
| Dominican Rep. | 2002         | 2002       | 2.3%               | 12.3%               |
| Dominican Rep. | 2007         | 2007       | 2.2%               | 11.4%               |
| Dominican Rep. | 2013         | 2013       | 2.6%               | 7.6%                |
| Egypt          | 2003         | 2003       | 5.1%               | 20.1%               |
| Egypt          | 2005         | 2005       | 5.7%               | 27.2%               |
| Egypt          | 2008         | 2008       | 8.3%               | 29.7%               |
| Egypt          | 2014         | 2014       | 13.0%              | 20.1%               |
| Ethiopia       | 2008         | 2016       | 12.4%              | 36.4%               |

|            |      |      |       |       |
|------------|------|------|-------|-------|
| Ethiopia   | 2011 | 2011 | 12.1% | 42.3% |
| Ghana      | 2003 | 2003 | 9.6%  | 36.1% |
| Ghana      | 2008 | 2008 | 10.0% | 27.9% |
| Ghana      | 2014 | 2014 | 5.1%  | 19.2% |
| Guinea     | 2005 | 2005 | 11.4% | 38.8% |
| Guinea     | 2012 | 2012 | 11.3% | 30.7% |
| Guinea     | 2018 | 2018 | 9.4%  | 30.6% |
| Haiti      | 2005 | 2006 | 9.7%  | 29.5% |
| Haiti      | 2012 | 2012 | 5.3%  | 22.3% |
| Haiti      | 2016 | 2017 | 3.8%  | 21.4% |
| Honduras   | 2005 | 2006 | 1.5%  | 35.1% |
| Honduras   | 2011 | 2012 | 1.5%  | 25.4% |
| India      | 2005 | 2006 | 19.2% | 43.5% |
| India      | 2015 | 2016 | 21.1% | 38.1% |
| India      | 2019 | 2021 | 18.6% | 35.9% |
| Jordan     | 2002 | 2002 | 2.5%  | 13.2% |
| Jordan     | 2007 | 2007 | 9.1%  | 16.1% |
| Jordan     | 2009 | 2009 | 1.7%  | 10.2% |
| Jordan     | 2012 | 2012 | 2.4%  | 8.8%  |
| Kenya      | 2003 | 2003 | 7.6%  | 34.5% |
| Kenya      | 2008 | 2009 | 8.9%  | 34.2% |
| Kenya      | 2014 | 2014 | 5.8%  | 27.1% |
| Lesotho    | 2004 | 2004 | 6.1%  | 44.2% |
| Lesotho    | 2009 | 2010 | 4.8%  | 39.4% |
| Lesotho    | 2014 | 2014 | 3.8%  | 34.5% |
| Liberia    | 2007 | 2007 | 8.3%  | 38.3% |
| Liberia    | 2013 | 2013 | 6.9%  | 31.1% |
| Malawi     | 2004 | 2004 | 6.9%  | 52.3% |
| Malawi     | 2010 | 2010 | 4.5%  | 46.6% |
| Malawi     | 2015 | 2016 | 3.4%  | 35.5% |
| Maldives   | 2009 | 2009 | 12.3% | 19.0% |
| Maldives   | 2016 | 2017 | 9.5%  | 15.1% |
| Mali       | 2001 | 2001 | 13.7% | 42.1% |
| Mali       | 2006 | 2006 | 17.2% | 38.1% |
| Mali       | 2012 | 2013 | 14.0% | 37.5% |
| Mali       | 2018 | 2018 | 9.8%  | 27.5% |
| Mozambique | 2003 | 2003 | 5.3%  | 45.4% |
| Mozambique | 2011 | 2011 | 5.7%  | 39.5% |
| Namibia    | 2006 | 2007 | 8.5%  | 29.1% |
| Namibia    | 2013 | 2013 | 8.8%  | 22.4% |
| Nepal      | 2006 | 2006 | 12.8% | 50.1% |
| Nepal      | 2011 | 2011 | 10.9% | 41.5% |
| Nepal      | 2016 | 2016 | 9.8%  | 36.0% |
| Niger      | 2006 | 2006 | 13.1% | 49.5% |

|              |      |      |       |       |
|--------------|------|------|-------|-------|
| Niger        | 2012 | 2012 | 19.3% | 41.9% |
| Nigeria      | 2003 | 2003 | 12.3% | 41.8% |
| Nigeria      | 2008 | 2008 | 16.5% | 42.2% |
| Nigeria      | 2013 | 2013 | 17.7% | 35.9% |
| Nigeria      | 2018 | 2018 | 6.9%  | 36.1% |
| Pakistan     | 2012 | 2013 | 11.0% | 45.3% |
| Pakistan     | 2017 | 2018 | 9.3%  | 39.3% |
| Peru         | 2003 | 2008 | 1.0%  | 29.9% |
| Peru         | 2009 | 2009 | 0.8%  | 27.0% |
| Peru         | 2010 | 2010 | 0.8%  | 25.5% |
| Peru         | 2011 | 2011 | 0.6%  | 23.1% |
| Peru         | 2012 | 2012 | 0.7%  | 21.0% |
| Rwanda       | 2005 | 2005 | 4.9%  | 49.9% |
| Rwanda       | 2010 | 2010 | 3.1%  | 43.8% |
| Rwanda       | 2014 | 2015 | 2.4%  | 37.6% |
| Senegal      | 2005 | 2005 | 9.6%  | 20.8% |
| Senegal      | 2010 | 2011 | 10.2% | 30.5% |
| Senegal      | 2012 | 2013 | 10.6% | 20.2% |
| Senegal      | 2014 | 2014 | 7.0%  | 21.6% |
| Senegal      | 2015 | 2015 | 8.3%  | 22.0% |
| Senegal      | 2016 | 2016 | 7.6%  | 19.1% |
| Senegal      | 2017 | 2017 | 9.6%  | 19.2% |
| Senegal      | 2019 | 2019 | 9.2%  | 19.5% |
| Sierra Leone | 2008 | 2008 | 12.3% | 34.8% |
| Sierra Leone | 2013 | 2013 | 10.5% | 37.7% |
| Sierra Leone | 2019 | 2019 | 5.8%  | 30.1% |
| Tajikistan   | 2012 | 2012 | 10.5% | 25.2% |
| Tajikistan   | 2017 | 2017 | 6.7%  | 18.4% |
| Tanzania     | 2004 | 2005 | 4.5%  | 42.7% |
| Tanzania     | 2010 | 2010 | 6.9%  | 39.9% |
| Tanzania     | 2015 | 2016 | 5.1%  | 33.5% |
| Timor-Leste  | 2009 | 2010 | 20.8% | 56.6% |
| Timor-Leste  | 2016 | 2016 | 25.7% | 46.1% |
| Uganda       | 2000 | 2001 | 5.7%  | 44.9% |
| Uganda       | 2006 | 2006 | 7.0%  | 38.4% |
| Uganda       | 2011 | 2011 | 5.8%  | 32.5% |
| Uganda       | 2016 | 2016 | 4.0%  | 28.4% |
| Zambia       | 2001 | 2002 | 6.4%  | 53.2% |
| Zambia       | 2007 | 2007 | 6.6%  | 44.2% |
| Zambia       | 2013 | 2014 | 6.9%  | 39.5% |
| Zambia       | 2018 | 2019 | 4.4%  | 34.8% |
| Zimbabwe     | 2005 | 2006 | 7.6%  | 34.1% |
| Zimbabwe     | 2010 | 2011 | 3.7%  | 31.6% |
| Zimbabwe     | 2015 | 2015 | 3.8%  | 25.6% |

Source: See Methods and Materials for data sources.

**Supplementary Table 4. Sample sizes and population shares pooled by country**

| Country        | DHS observations | Population under-5 | Sample share | Population share |
|----------------|------------------|--------------------|--------------|------------------|
| Albania        | 3866             | 171,796            | 0.30%        | 0.06%            |
| Armenia        | 4205             | 201,083            | 0.33%        | 0.07%            |
| Bangladesh     | 34000            | 15,300,000         | 2.67%        | 4.95%            |
| Benin          | 39814            | 1,558,812          | 3.13%        | 0.50%            |
| Bolivia        | 17005            | 1,192,606          | 1.34%        | 0.39%            |
| Burkina Faso   | 15218            | 2,842,946          | 1.20%        | 0.92%            |
| Burundi        | 9534             | 1,578,653          | 0.75%        | 0.51%            |
| Cambodia       | 11785            | 1,672,089          | 0.93%        | 0.54%            |
| Cameroon       | 12927            | 3,462,007          | 1.02%        | 1.12%            |
| Chad           | 14854            | 2,324,090          | 1.17%        | 0.75%            |
| Colombia       | 28471            | 3,834,004          | 2.24%        | 1.24%            |
| Congo, Rep.    | 8516             | 702,728            | 0.67%        | 0.23%            |
| Congo, DRC     | 11719            | 12,100,000         | 0.92%        | 3.92%            |
| Dominican Rep. | 21963            | 989,582            | 1.73%        | 0.32%            |
| Egypt          | 43689            | 9,744,422          | 3.43%        | 3.15%            |
| Ethiopia       | 18738            | 14,200,000         | 1.47%        | 4.59%            |
| Ghana          | 8309             | 3,587,524          | 0.65%        | 1.16%            |
| Guinea         | 9345             | 1,771,639          | 0.73%        | 0.57%            |
| Haiti          | 12196            | 1,263,146          | 0.96%        | 0.41%            |
| Honduras       | 18973            | 1,036,071          | 1.49%        | 0.34%            |
| India          | 477032           | 128,000,000        | 37.51%       | 41.42%           |
| Jordan         | 20226            | 1,003,583          | 1.59%        | 0.32%            |
| Kenya          | 28867            | 6,852,972          | 2.27%        | 2.22%            |
| Lesotho        | 4394             | 249,721            | 0.35%        | 0.08%            |
| Liberia        | 7679             | 370,759            | 0.60%        | 0.12%            |
| Malawi         | 18293            | 2,632,444          | 1.44%        | 0.85%            |
| Maldives       | 4771             | 33,981             | 0.38%        | 0.01%            |
| Mali           | 34168            | 2,928,051          | 2.69%        | 0.95%            |
| Mozambique     | 17784            | 4,176,654          | 1.40%        | 1.35%            |
| Namibia        | 5592             | 288,161            | 0.44%        | 0.09%            |
| Nepal          | 9987             | 3,022,827          | 0.79%        | 0.98%            |
| Niger          | 8790             | 665,690            | 0.69%        | 0.22%            |
| Nigeria        | 62933            | 27,700,000         | 4.95%        | 8.96%            |
| Pakistan       | 6802             | 24,000,000         | 0.53%        | 7.77%            |
| Peru           | 46281            | 3,004,452          | 3.64%        | 0.97%            |
| Rwanda         | 11385            | 1,578,409          | 0.90%        | 0.51%            |
| Senegal        | 47295            | 2,147,173          | 3.72%        | 0.69%            |
| Sierra Leone   | 10703            | 1,054,666          | 0.84%        | 0.34%            |
| Tajikistan     | 10564            | 987,283            | 0.83%        | 0.32%            |
| Tanzania       | 23117            | 7,901,238          | 1.82%        | 2.56%            |
| Timor-Leste    | 13843            | 160,956            | 1.09%        | 0.05%            |
| Uganda         | 11663            | 6,266,988          | 0.92%        | 2.03%            |
| Zambia         | 31231            | 2,486,008          | 2.46%        | 0.80%            |
| Zimbabwe       | 13359            | 1,997,281          | 1.05%        | 0.65%            |

Source: See Methods and Materials for data sources.



**Supplementary Table 5. Weighted multivariate linear probability models of severe wasting risks as a function of 5% increases in the real food price index over the past 3 months interacted with urban locality, gender, asset poverty and farmland ownership**

| Interaction variable<br>Sample | (1)<br>Poverty<br>Full      | (2)<br>Girl<br>Full         | (3)<br>Urban<br>Full        | (4)<br>Farmland<br>Rural    | (5)<br>Multiple<br>Urban    | (6)<br>Multiple<br>Rural    |
|--------------------------------|-----------------------------|-----------------------------|-----------------------------|-----------------------------|-----------------------------|-----------------------------|
| Food inflation                 | 0.22***<br>(0.06 - 0.38)    | 0.23***<br>(0.08 - 0.39)    | 0.13*<br>(-0.01 - 0.26)     | 0.42***<br>(0.31 - 0.52)    | 0.22***<br>(0.09 - 0.35)    | -0.15***<br>(-0.17 - -0.14) |
| Food inflation*urban           | -0.14***<br>(-0.22 - -0.05) |                             |                             |                             | -0.09**<br>(-0.16 - -0.02)  |                             |
| Food inflation*girl            |                             | -0.12***<br>(-0.15 - -0.08) |                             |                             | -0.12***<br>(-0.15 - -0.09) | -0.15***<br>(-0.17 - -0.14) |
| Food inflation*asset-poor      |                             |                             | 0.19**<br>(0.03 - 0.36)     |                             | 0.17**<br>(0.01 - 0.32)     | 0.36***<br>(0.26 - 0.47)    |
| Food inflation*farmland        |                             |                             |                             | -0.17***<br>(-0.24 - -0.11) |                             | -0.17***<br>(-0.24 - -0.11) |
| Urban locality                 |                             |                             |                             | -0.00<br>(-0.01 - 0.00)     |                             | -0.00<br>(-0.01 - 0.00)     |
| Girl child                     | 0.03***<br>(0.02 - 0.03)    | 0.03***<br>(0.02 - 0.03)    | 0.03***<br>(0.02 - 0.04)    | 0.03***<br>(0.03 - 0.04)    | 0.03***<br>(0.02 - 0.04)    | 0.04***<br>(0.03 - 0.05)    |
| Asset-poor                     | 0.01***<br>(0.00 - 0.01)    | 0.01***<br>(0.00 - 0.01)    | 0.01***<br>(0.00 - 0.01)    |                             | 0.01***<br>(0.00 - 0.01)    |                             |
| Farmland ownership             | -0.02***<br>(-0.02 - -0.01) | -0.02***<br>(-0.02 - -0.01) | -0.02***<br>(-0.02 - -0.01) | -0.02***<br>(-0.02 - -0.01) | -0.02***<br>(-0.02 - -0.01) | -0.02***<br>(-0.02 - -0.01) |
| Observations                   | 1,271,886                   | 1,271,886                   | 1,271,886                   | 719,457                     | 1,271,886                   | 719,457                     |
| R-squared                      | 0.06                        | 0.06                        | 0.06                        | 0.05                        | 0.06                        | 0.05                        |

Notes: 95% confidence intervals based on standard errors clustered at the country level are reported in parentheses. Regressions are weighted (See Methods and Materials). Coefficients represent the proportional change in wasting risks from a 5% increase in the real food price index over the past 3 months. The model also incorporates an extensive set of controls described in the Methods and Materials, including DHS variables, and various temporal effects and country fixed effects.

**Supplementary Table 6. Weighted multivariate linear probability models of wasting risks as a function of 5% increases in the real food price index over the past 3 months, controlling for other national level indicators**

|                 | (1)<br>Base<br>model     | (2)<br>Money<br>growth   | (3)<br>Conflict<br>(battle deaths) | (5)<br>Exchange rate<br>changes | (6)<br>Food production<br>growth | (7)<br>Terms of trade<br>changes | (8)<br>All country<br>covariates |
|-----------------|--------------------------|--------------------------|------------------------------------|---------------------------------|----------------------------------|----------------------------------|----------------------------------|
| Food inflation  | 0.09***<br>(0.03 - 0.14) | 0.09***<br>(0.03 - 0.14) | 0.08***<br>(0.02 - 0.13)           | 0.08***<br>(0.03 - 0.14)        | 0.08***<br>(0.03 - 0.14)         | 0.09***<br>(0.04 - 0.13)         | 0.08***<br>(0.03 - 0.14)         |
| Broad money     |                          | -0.01<br>(-0.11 - 0.08)  |                                    |                                 |                                  |                                  | -0.02<br>(-0.11 - 0.08)          |
| Battle deaths   |                          |                          | 1.51<br>(-0.88 - 3.90)             |                                 |                                  |                                  | 0.33<br>(-1.89 - 2.55)           |
| Exchange rate   |                          |                          |                                    | -0.03<br>(-0.11 - 0.04)         |                                  |                                  | -0.02<br>(-0.07 - 0.04)          |
| Food production |                          |                          |                                    |                                 | 0.04<br>(-0.07 - 0.15)           |                                  | 0.03<br>(-0.05 - 0.11)           |
| Terms of trade  |                          |                          |                                    |                                 |                                  | -0.18**<br>(-0.35 - -0.02)       | -0.17**<br>(-0.33 - -0.01)       |
| Observations    | 1,271,886                | 1,271,886                | 1,271,886                          | 1,271,886                       | 1,271,886                        | 1,271,886                        | 1,271,886                        |
| R-squared       | 0.06                     | 0.06                     | 0.06                               | 0.06                            | 0.06                             | 0.06                             | 0.06                             |

Notes: 95% confidence intervals based on standard errors clustered at the country level are reported in parentheses. Regressions are weighted to be representative of the < 5 year population of children of all countries included in this DHS dataset. These coefficients can be interpreted as elasticities, or the proportion change in wasting risks from a 10% increase in the real food price index over the past 3 months. The model also incorporates an extensive set of controls as detailed in the Methods and Materials

**Supplementary Table 7. Weighted multivariate linear probability models of stunting risks as a function of 5% increases in the real food price index in the first 1000 days of life, interacted with urban locality, gender, asset poverty and farmland ownership**

| Interactions<br>Sample                          | (1)<br>Urban<br>Full sample | (2)<br>Girl<br>Full sample | (3)<br>Asset-poor<br>Full Sample | (4)<br>Farmland<br>Rural sample |
|-------------------------------------------------|-----------------------------|----------------------------|----------------------------------|---------------------------------|
| Food inflation, prenatal                        | 0.01*<br>(-0.00 - 0.02)     | 0.01<br>(-0.01 - 0.03)     | 0.02***<br>(0.01 - 0.03)         | -0.05*<br>(-0.11 - 0.01)        |
| Food inflation, 1 <sup>st</sup> year            | 0.02**<br>(0.00 - 0.03)     | 0.02***<br>(0.01 - 0.03)   | 0.02**<br>(0.00 - 0.03)          | 0.01<br>(-0.00 - 0.02)          |
| Food inflation, 2 <sup>nd</sup> year            | 0.01<br>(-0.01 - 0.03)      | 0.00<br>(-0.02 - 0.03)     | 0.02*<br>(-0.00 - 0.04)          | 0.00<br>(-0.01 - 0.02)          |
| Food inflation, prenatal*Urban                  | 0.03***<br>(0.01 - 0.05)    |                            |                                  |                                 |
| Food inflation, 1 <sup>st</sup> year*Urban      | 0.00<br>(-0.01 - 0.02)      |                            |                                  |                                 |
| Food inflation, 2 <sup>nd</sup> year*Urban      | 0.01<br>(-0.03 - 0.05)      |                            |                                  |                                 |
| Food inflation, prenatal*Girl                   |                             | 0.01<br>(-0.01 - 0.03)     |                                  |                                 |
| Food inflation, 1 <sup>st</sup> year*Girl       |                             | 0.00<br>(-0.00 - 0.01)     |                                  |                                 |
| Food inflation, 2 <sup>nd</sup> year*Girl       |                             | 0.02*<br>(-0.00 - 0.04)    |                                  |                                 |
| Food inflation, prenatal*Asset-poor             |                             |                            | -0.01<br>(-0.03 - 0.00)          |                                 |
| Food inflation, 1 <sup>st</sup> year*Asset-poor |                             |                            | 0.00<br>(-0.01 - 0.01)           |                                 |
| Food inflation, 2 <sup>nd</sup> year*Asset-poor |                             |                            | -0.01<br>(-0.05 - 0.02)          |                                 |
| Food inflation, prenatal*Farmland               |                             |                            |                                  | 0.00<br>(-0.02 - 0.02)          |
| Food inflation, 1 <sup>st</sup> year*Farmland   |                             |                            |                                  | -0.00<br>(-0.01 - 0.01)         |
| Food inflation, 2 <sup>nd</sup> year*Farmland   |                             |                            |                                  | 0.00<br>(-0.03 - 0.04)          |
| Urban locality                                  | -0.05<br>(-0.14 - 0.05)     | -0.02*<br>(-0.04 - 0.00)   | -0.02*<br>(-0.04 - 0.00)         |                                 |

|                    |                          |                            |                          |                          |
|--------------------|--------------------------|----------------------------|--------------------------|--------------------------|
| Girl child         | -0.01<br>(-0.03 - 0.01)  | -0.03**<br>(-0.05 - -0.00) | -0.01<br>(-0.03 - 0.01)  | -0.01<br>(-0.03 - 0.01)  |
| Asset-poor         | 0.15***<br>(0.13 - 0.18) | 0.15***<br>(0.13 - 0.18)   | 0.15***<br>(0.07 - 0.24) | 0.16***<br>(0.15 - 0.18) |
| Farmland ownership |                          |                            |                          | -0.01<br>(-0.11 - 0.09)  |
| Observations       | 694,673                  | 694,673                    | 694,673                  | 419,768                  |
| R-squared          | 0.10                     | 0.10                       | 0.10                     | 0.07                     |

Notes: 95% confidence intervals based on standard errors clustered at the country level are reported in parentheses. Regressions are weighted (See Methods and Materials). Coefficients represent the proportional change in wasting risks from a 5% increase in the real food price index over the past 3 months. The model also incorporates an extensive set of controls described in the Methods and Materials, including DHS variables, and various temporal effects and country fixed effects.

# Supplementary Figures

**Supplementary Figure 1. Local polynomial estimates of wasting (WHZ < -2) prevalence against child age in months for various DHS strata**

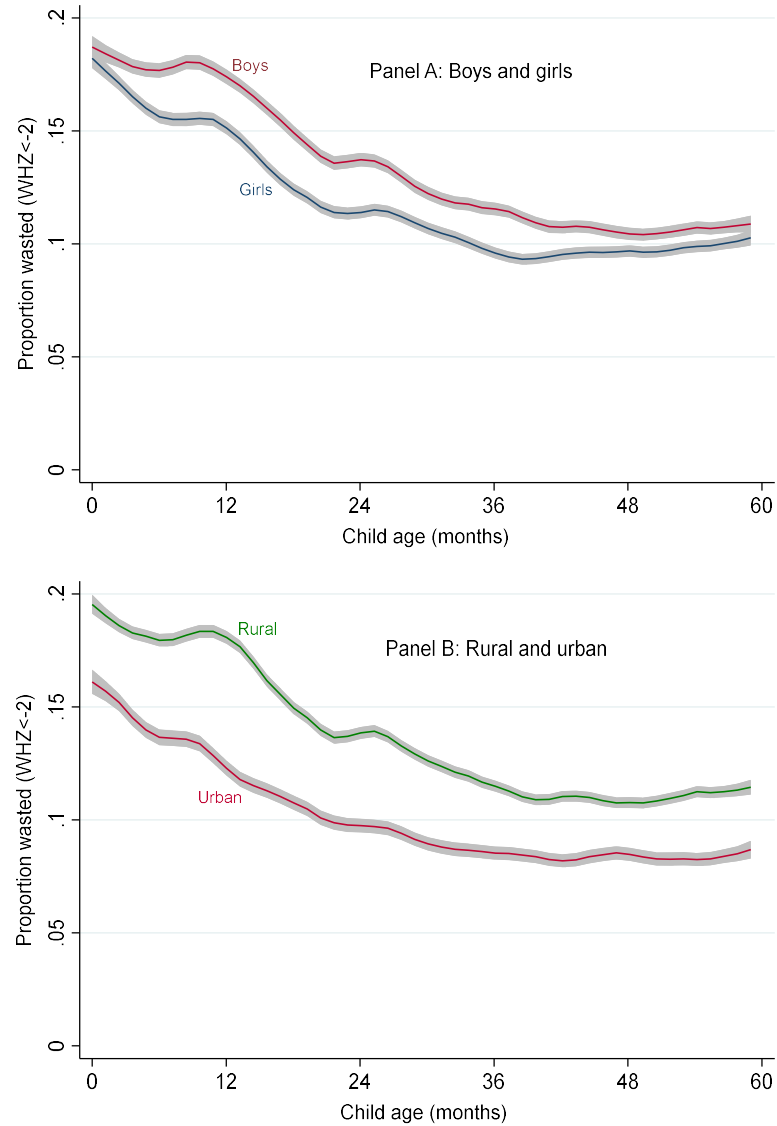

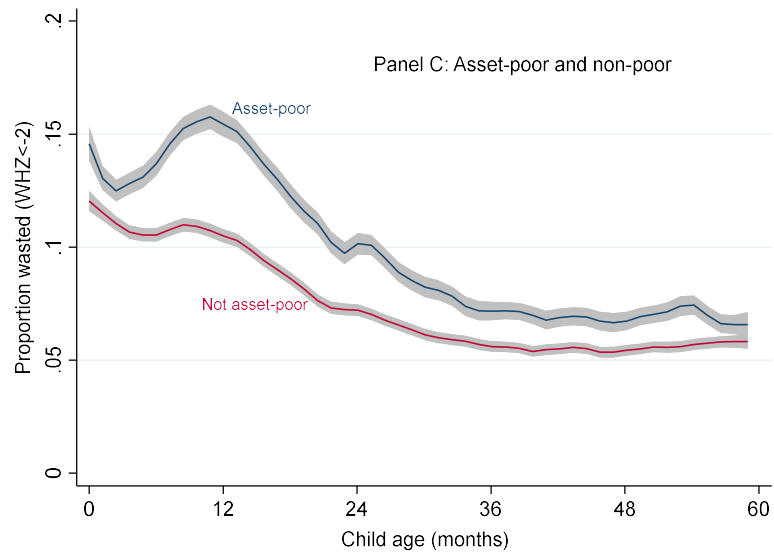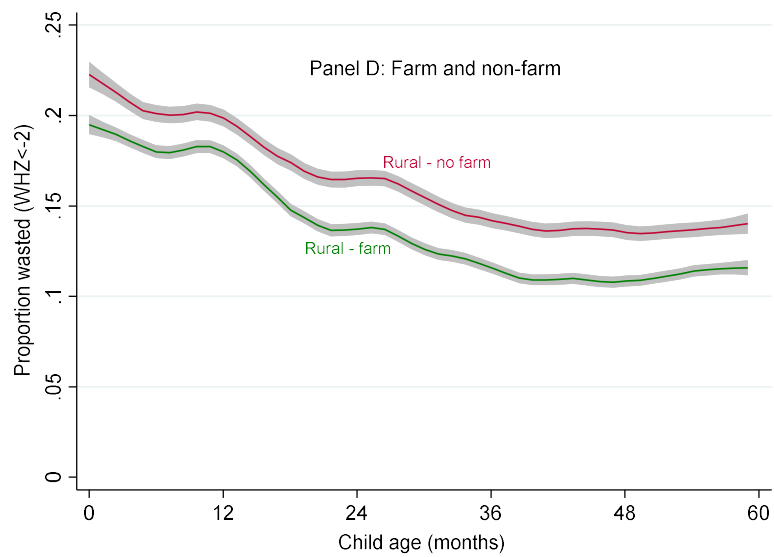

Source: Authors' estimates from DHS data using the *lpolys* command in STATA™. Panel A excludes India, but results for India are reported in Supplement Figure 2.

**Supplementary Figure 2. Local polynomial estimates of wasting (WHZ < -2) prevalence against child age in months for children from asset-poor and non-poor households in India**

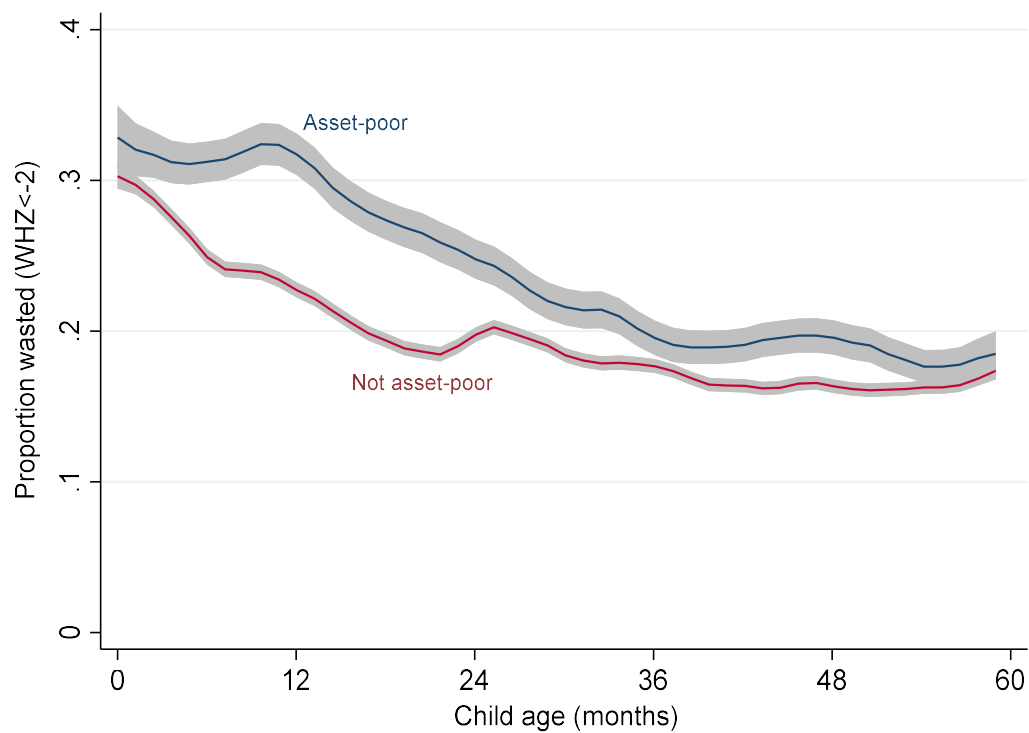

Source: Authors' estimates from DHS data using the `lpoly` command in STATA™.

**Supplementary Figure 3. A histogram of real food price changes in the 3 months prior to wasting measurement**

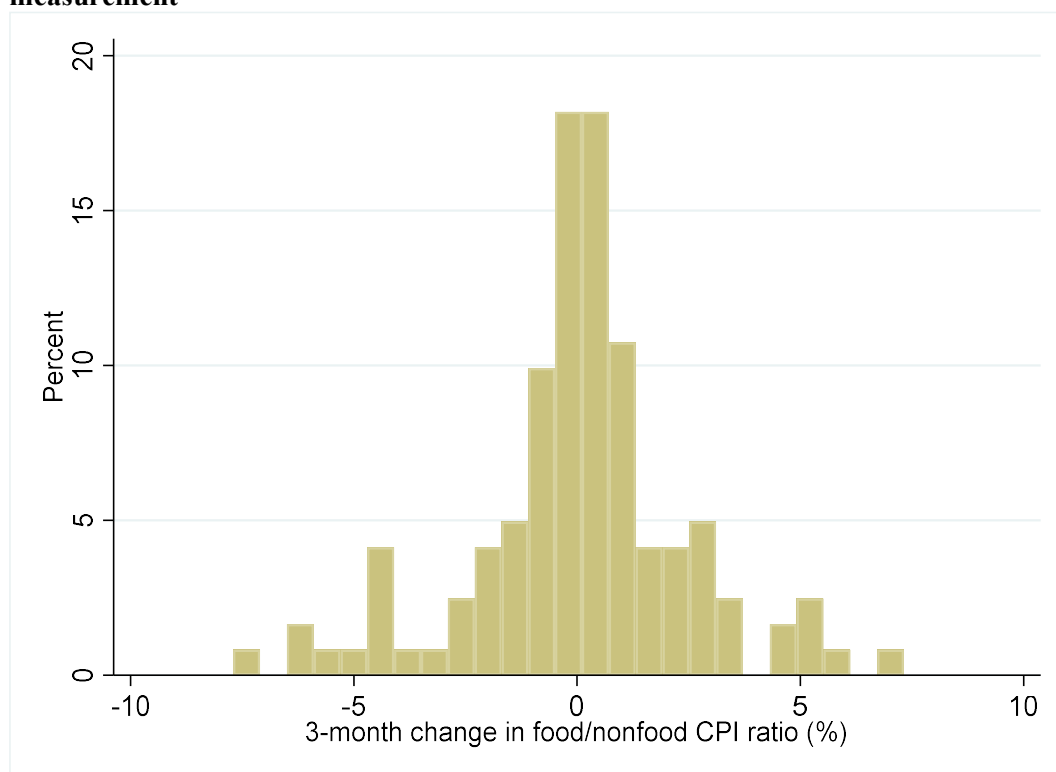

Source: Authors' calculations from FAO consumer price index data.<sup>57</sup>



**Supplementary Figure 4. Weighted multivariate linear probability models of wasting and stunting risks as a function of poor diet diversity in the past 24 hours and diarrhea or fever in the past two weeks**

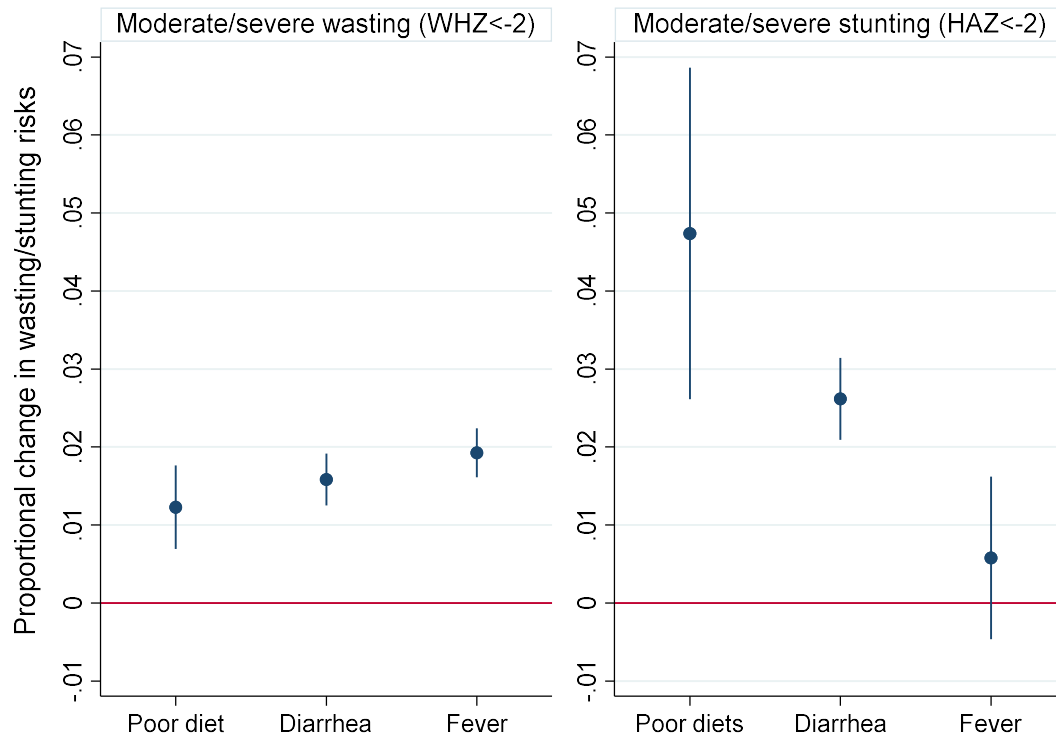

Notes: 95% confidence intervals based on standard errors clustered at the country level. Regressions are weighted (See Methods and Materials). The results show associations from two separate regressions for wasting and severe wasting. Coefficients represent the proportional change in wasting risks from a 5% increase in the real food price index over the past 3 months. The model also incorporates an extensive set of controls described in the Methods and Materials, including DHS variables, and various temporal effects and country fixed effects.

**Supplementary Figure 5. Weighted multivariate linear probability coefficients of wasting and severe wasting as a function of both food inflation and total inflation over the past 3 months**

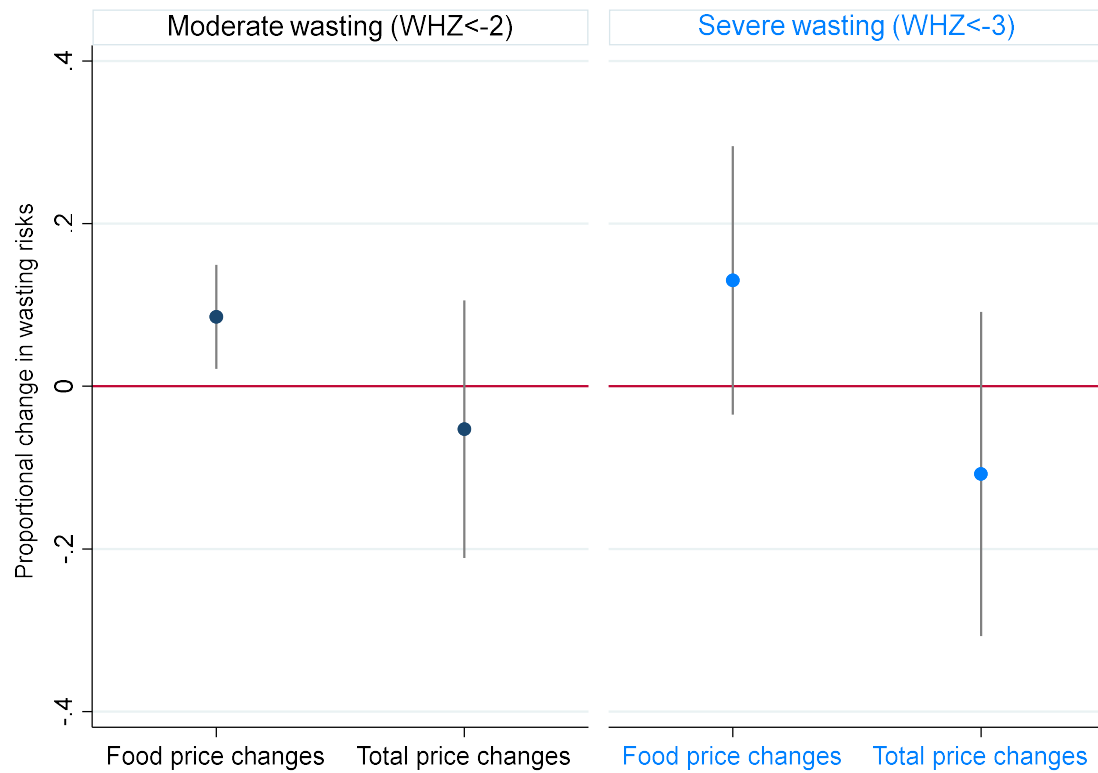

Notes: 95% confidence intervals based on standard errors clustered at the country level are reported in parentheses. Regressions are weighted (See Methods and Materials). Note that the results are not highly sensitive to inclusion/exclusion of either inflation measure. The model also incorporates an extensive set of controls described in the Methods and Materials, including DHS variables, and various temporal effects and country fixed effects.

**Supplementary Figure 6. Weighted multivariate linear probability coefficients of stunting and severe stunting for children 24-59 months as a function of food inflation and total inflation at various stages of the first 1000 days of life**

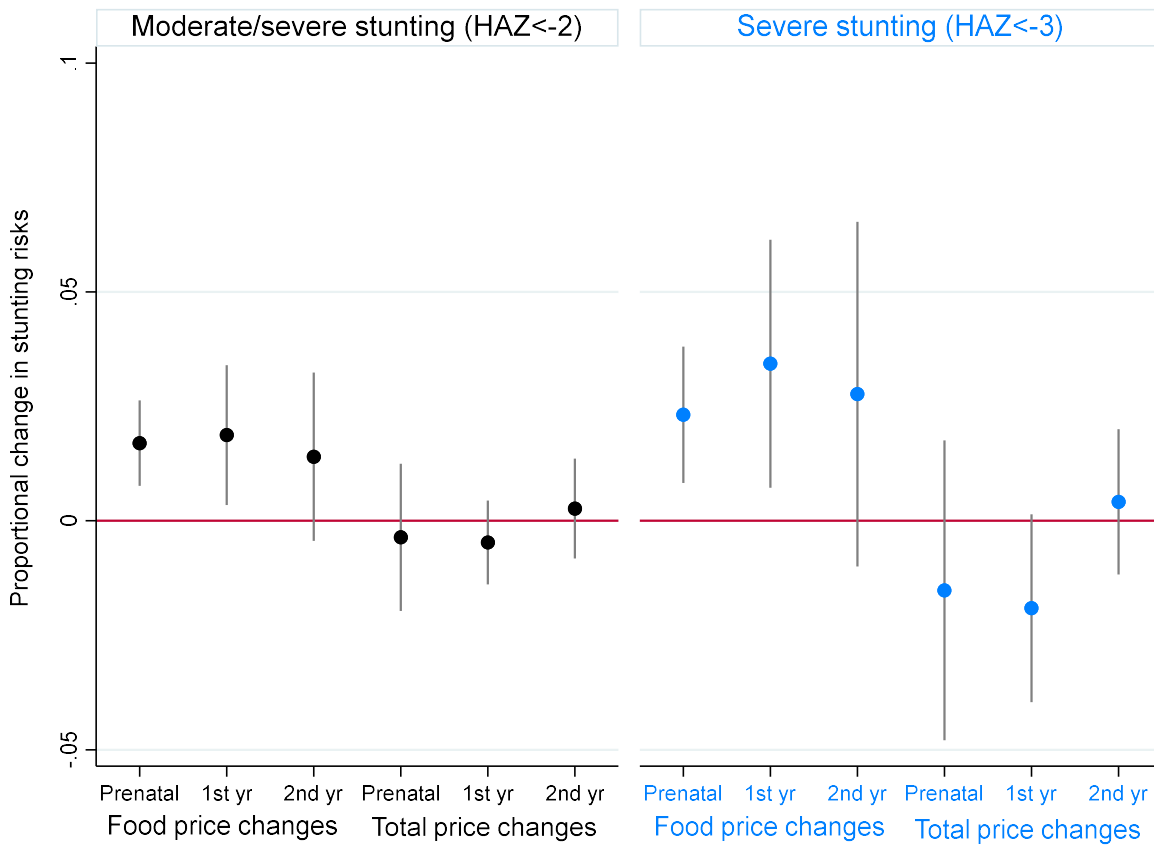

Notes: 95% confidence intervals based on standard errors clustered at the country level are reported in parentheses. Regressions are weighted (See Methods and Materials). However, the results are not sensitive to inclusion/exclusion of either inflation measure. The model also incorporates an extensive set of controls described in the Methods and Materials, including DHS variables, and various temporal effects and country fixed effects.
